# Supplementary material for: ARIH2 serves as a potential prognostic biomarker for hepatocellular carcinoma associated with immune infiltration and ferroptosis
Source: Frontiers journal article supplement (doi:10.3389/fimmu.2025.1548691), 2025-04-07
Supplement: Data_Sheet_1.zip [file Data_Sheet_1.zip]

## Sheet: Sheet1
gene_name	log2FoldChange	padj
TSPAN6	-0.336602	0.00017175
TNMD	-0.941403	0.00084746
DPM1	-0.0095547	0.893179
SCYL3	0.209778	0.00112055
C1orf112	0.679673	3.18273e-09
FGR	0.227253	0.089475
CFH	-0.526203	4.40622e-05
FUCA2	-0.224876	0.010069
GCLC	-0.0413783	0.747369
NFYA	0.509232	2.28234e-13
STPG1	-0.064308	0.56262
NIPAL3	0.171055	0.0187781
LAS1L	-0.166698	0.00575998
ENPP4	0.238298	0.0728633
SEMA3F	-0.0336868	0.731949
CFTR	0.159007	0.726478
ANKIB1	0.515664	5.33918e-13
CYP51A1	0.779601	1.05004e-05
KRIT1	0.018778	0.786507
RAD52	0.272977	9.5321e-05
MYH16	0.15488	0.467527
BAD	-0.517508	2.05898e-12
LAP3	-0.315756	0.00249868
CD99	-0.250434	0.000753122
HS3ST1	0.446049	0.00547761
AOC1	-0.0700609	0.847483
WNT16	0.163822	0.551989
HECW1	0.575819	0.0163724
MAD1L1	-0.587546	0.00506017
LASP1	0.302851	1.50994e-05
SNX11	-0.188511	0.000583122
TMEM176A	-0.726915	4.93036e-10
M6PR	0.538537	4.91981e-10
KLHL13	0.730218	9.89179e-07
CYP26B1	1.47821	8.47151e-10
ICA1	-0.00489692	0.98278
DBNDD1	-0.336219	0.0429338
ALS2	0.238681	8.6703e-05
CASP10	0.0864282	0.240484
CFLAR	0.0743769	0.155418
TFPI	-0.249054	0.0887444
NDUFAF7	-0.214837	7.6261e-06
RBM5	0.290666	7.50211e-11
MTMR7	0.473101	0.0247558
SLC7A2	-0.161459	0.39965
ARF5	-0.248044	1.42496e-05
SARM1	0.488647	8.77337e-06
POLDIP2	-0.393142	1.13761e-13
PLXND1	0.0105147	0.932767
AK2	-0.25379	1.62163e-05
CD38	0.83001	1.99752e-05
FKBP4	-0.0251504	0.794816
KDM1A	0.156188	0.0120739
RBM6	0.111336	0.0606589
CAMKK1	0.106844	0.480229
RECQL	0.783896	3.09147e-14
VPS50	0.243344	5.51508e-06
HSPB6	-0.293684	0.166902
ARHGAP33	0.522609	6.94472e-08
NDUFAB1	-0.709897	7.57142e-25
PDK4	-0.114239	0.627891
SLC22A16	0.449276	0.0751522
ZMYND10	-0.0750807	0.661804
ABCB5	0.157632	0.73791
ARX	-0.611359	0.156068
SLC25A13	-0.061557	0.574776
ST7	-0.524087	3.01265e-13
CDC27	0.265332	8.91724e-10
SLC4A1	-0.583423	0.037278
CALCR	1.41819	1.7915e-07
HCCS	-0.00501981	0.947568
DVL2	0.501112	1.77465e-14
PRSS22	1.15437	0.000564764
UPF1	0.109903	0.0539154
SKAP2	0.342594	0.0026459
SLC25A5	-0.247556	0.00150962
MCUB	0.492495	0.000920493
HOXA11	0.778427	0.0406014
POLR2J	-0.772235	7.82978e-20
DHX33	0.100329	0.11302
MEOX1	0.346676	0.159106
THSD7A	0.41122	0.0101004
LIG3	0.178743	0.00160483
RPAP3	0.191404	9.02435e-07
ACSM3	-0.387108	0.0251348
REXO5	0.416722	0.000248594
CIAPIN1	-0.208559	0.000952348
SPPL2B	-0.225781	0.00141529
FAM214B	-0.10539	0.147894
COPZ2	-0.671479	9.58064e-09
PRKAR2B	0.220416	0.291863
MSL3	0.0979677	0.0378915
CREBBP	0.313526	4.29757e-08
TSPOAP1	0.293703	0.0364194
MPO	-0.177604	0.501754
PON1	-0.928345	1.48775e-07
GCFC2	-0.0198828	0.798781
WDR54	0.093236	0.540392
CROT	0.00456917	0.977084
ABCB4	-0.527551	0.00402492
KMT2E	0.500277	3.85398e-15
RHBDD2	-0.383699	1.31504e-06
SOX8	-0.0282587	0.916913
IBTK	0.0364802	0.678485
ZNF195	0.376911	7.36475e-11
MYCBP2	0.260874	0.000793617
FBXL3	0.000542655	0.995204
ITGAL	-0.0613172	0.680655
PDK2	0.0349909	0.772
ITGA3	1.17124	1.68706e-10
ZFX	0.468217	1.47797e-10
LAMP2	-0.11328	0.231272
ITGA2B	0.0469898	0.848247
ASB4	0.0768111	0.798571
GDE1	0.149103	0.0260709
REX1BD	-0.824645	3.03925e-20
CRLF1	-0.687613	0.00195339
OSBPL7	0.309392	0.0201384
TMEM98	0.218772	0.182022
YBX2	0.578048	0.0229538
MAP3K14	0.237498	0.0454652
ABCC8	0.115576	0.726408
TMEM132A	0.43104	0.0333274
AP2B1	0.0610509	0.383289
TAC1	2.19143	0.000251719
ZNF263	-0.100886	0.0520105
CX3CL1	-0.12938	0.346032
SPATA20	-0.217839	0.0161953
CACNA1G	0.341544	0.265085
TNFRSF12A	-0.222132	0.111156
DLX6	1.22115	0.015655
MAP3K9	0.569133	1.29183e-12
RALA	0.0555786	0.332564
BAIAP2L1	-0.196166	0.126537
KDM7A	0.211883	0.0098705
ETV1	0.550379	0.000634167
AGK	0.13352	0.0363173
ALDH3B1	0.337619	0.00962988
TTC22	0.236483	0.0939097
PHTF2	0.467683	1.24123e-12
CCL26	0.366893	0.197493
FARP2	0.354169	1.85959e-08
USH1C	0.0966114	0.836435
GGCT	-0.424683	7.56542e-07
DBF4	0.657827	2.38811e-20
TBXA2R	-0.655678	2.15448e-09
IFRD1	-0.300851	0.0017244
LGALS14	4.12052	3.9202e-08
COX10	-0.14663	0.0696512
GTF2IRD1	0.442976	2.97756e-07
PAF1	-0.36844	1.18814e-10
VPS41	0.10659	0.115046
ARHGAP44	0.24305	0.307987
ELAC2	-0.194226	0.00155367
SCIN	1.46118	6.64034e-13
ARSD	-0.412877	3.8712e-05
PNPLA4	-0.426225	1.26886e-08
MYH13	0.168725	0.744452
ADIPOR2	0.0251538	0.810411
CDKL3	-0.0912312	0.353324
UPP2	-0.498575	0.113415
PRSS21	-0.517069	0.119584
MARK4	-0.0874495	0.259855
PROM1	2.1089	4.32612e-11
CCDC124	-0.550658	6.16824e-14
CEACAM21	0.0513082	0.797912
PAFAH1B1	0.00862816	0.900805
NOS2	-0.603802	0.000193162
DNAH9	-0.552331	0.0500504
KIAA0100	0.115351	0.116614
SLC13A2	1.13042	2.88294e-05
GAS7	0.47922	0.00181048
TRAPPC6A	-0.685698	7.08078e-14
MATK	-0.66646	3.59066e-07
CEACAM7	-1.81003	0.00822697
CD79B	-0.381915	0.00784485
SCN4A	-0.366374	0.0153876
ST7L	0.0504646	0.415611
TKTL1	2.28838	1.86996e-15
PAX6	0.899853	0.015039
RPUSD1	-0.233879	0.00193331
RHBDF1	0.102675	0.375906
LUC7L	-0.104923	0.193757
CACNA2D2	0.600711	8.88756e-05
BAIAP3	0.0368496	0.819951
TSR3	-0.488632	1.72993e-13
PIGQ	-0.496899	2.24173e-11
CRAMP1	0.295191	1.4856e-06
TEAD3	0.237941	0.000370042
SELE	-1.11908	8.55066e-08
DNAJC11	0.337481	5.70952e-05
FMO3	-0.4782	0.00971034
MYLIP	0.368157	0.000374449
NOX1	0.122299	0.427068
E2F2	0.838011	6.91015e-10
PSMB1	-0.61051	2.28462e-15
SYN1	-0.33005	0.130413
JARID2	0.47015	1.7188e-13
CDKL5	0.640179	3.16128e-11
CAMK1G	-0.0482992	0.848846
CDK11A	-0.268852	0.00565258
NADK	-0.1589	0.0459764
TFAP2B	1.4915	0.0119758
DLEC1	-0.0619144	0.709348
CYTH3	0.242941	0.0120682
ADAM22	0.446504	0.0251862
SYPL1	0.0104277	0.895312
CYB561	-0.109868	0.514528
SPAG9	0.264777	4.67428e-05
CELSR3	0.610762	6.35437e-05
AASS	0.0270237	0.915409
PLEKHG6	0.169418	0.366113
SS18L2	-0.443447	3.22687e-10
MPND	-0.459755	2.88636e-08
MGST1	-0.66102	8.40296e-08
CRY1	0.295126	0.000228152
PGLYRP1	-0.281968	0.198083
NFIX	0.200816	0.0646263
ST3GAL1	-0.123417	0.432789
MMP25	-0.258615	0.0842734
IL32	-1.2365	1.61809e-18
PKD1	0.613002	1.73578e-09
MAPK8IP2	-0.117361	0.634282
MED24	0.192125	0.00017886
RHOBTB2	0.051498	0.671211
HEATR5B	0.375916	4.03154e-10
SEC62	-0.161276	0.00582318
RPS20	-0.948915	3.75023e-21
CSDE1	0.103623	0.0749282
UBE3C	0.261015	8.91046e-05
REV3L	0.403969	3.56063e-07
TENM1	0.539529	0.0670918
PAX7	-0.852691	0.162423
MASP2	-1.13388	2.54828e-11
IYD	-0.303754	0.142804
FAM76A	-0.0587843	0.386709
TRAF3IP3	0.33915	0.0219599
POMT2	0.122286	0.0689287
VTA1	0.157234	0.00866889
MLXIPL	-0.357033	0.00320316
BAZ1B	0.419314	1.00402e-19
RANBP9	0.300328	4.03513e-05
ETV7	-0.0454895	0.841193
SPRTN	0.240895	2.25575e-06
EEF1AKNMT	0.121817	0.0416149
DYRK4	-0.439889	1.34497e-08
ZNF207	0.196062	4.21474e-08
UQCRC1	-0.487004	9.64918e-12
STARD3NL	0.187946	0.0219076
CD9	-0.0737542	0.615063
HHATL	0.672811	0.0170506
NCAPD2	0.800449	8.84271e-21
IFFO1	-0.0465463	0.5709
GIPR	0.848432	9.38347e-05
PHF7	-0.0190031	0.869358
SEMA3G	-0.0509142	0.756102
NISCH	0.177569	0.000265505
STAB1	-0.0866667	0.511275
FUZ	-0.17332	0.215671
SLC6A13	-0.900246	1.72637e-06
IDS	0.265956	0.02203
PRSS3	-0.280431	0.472352
ZNF200	0.0903171	0.147051
CD4	0.0593386	0.709659
LRRC23	-0.400287	3.15185e-05
BTK	0.113879	0.473502
HFE	0.184983	0.0602463
SCMH1	0.274216	9.69179e-05
FYN	-0.385847	9.75728e-05
HIVEP2	0.280661	0.000547688
FMO1	1.17538	5.74076e-06
ELOA	-0.0362518	0.620376
LYPLA2	-0.364656	1.61177e-08
CLCN6	0.276017	0.000178267
MRC2	-0.0847454	0.684305
SLC6A7	0.586549	0.0442378
TSPAN9	-0.251892	0.0027716
BTBD7	0.374388	1.84214e-10
APBA3	-0.138442	0.0213776
MKS1	-0.0893464	0.202174
ABHD5	-0.0783802	0.348179
ANOS1	0.529297	0.00492925
AKAP8L	0.118713	0.0373597
MBTD1	0.350471	3.86424e-08
UTP18	0.155093	0.0114076
RNF216	0.303889	3.02101e-10
TTC19	-0.205662	0.0093197
PTBP1	0.132625	0.000329138
DPF1	0.312926	0.0916938
SYT7	-0.0912624	0.74128
LARS2	0.239459	0.000144427
PIK3C2A	0.414504	2.68358e-10
PLAUR	0.357462	0.0196683
ANLN	1.51435	6.56817e-33
WIZ	0.0699937	0.280348
RABGAP1	0.30233	2.85819e-08
DCN	-0.524976	0.033411
QPCTL	-0.306907	0.000358284
PPP5C	0.16061	0.00586245
CEP68	0.0608418	0.387059
MAP4K3	0.345983	9.36856e-06
ZBTB32	0.281557	0.0877476
TYROBP	-0.28011	0.0383997
TMEM159	0.218663	0.219937
GABRA3	1.17267	0.0180268
BRCA1	0.802129	1.2788e-17
ERCC1	-0.330815	1.3084e-05
CD22	-0.0216091	0.928721
SEMA3B	0.396031	0.0587233
MBTPS2	0.251392	0.000112553
PRICKLE3	0.135181	0.0231258
LTF	-0.531305	0.010833
EXTL3	0.2926	0.000688896
NR1H4	-0.253151	0.004699
ELOVL5	0.104111	0.308606
ALOX5	0.305355	0.1437
KDM5D	0.198521	0.60974
CALCOCO1	0.201792	0.00253473
UBR7	0.129173	0.0162974
MAP4K5	0.286682	1.17569e-05
EHD3	-0.0994015	0.502985
PSMC4	-0.285781	5.28624e-06
MAN2B2	-0.0751014	0.39114
SLC7A14	0.184304	0.603964
CLDN11	0.149004	0.532207
SLC25A39	-0.320841	6.76026e-07
MVP	-0.372492	0.000154351
NUB1	-0.140982	0.0102408
PGM3	0.110162	0.207002
RWDD2A	-0.0701116	0.3467
CLK1	0.14627	0.0903935
POLR3B	0.0714554	0.258355
ANGEL1	0.249842	0.00494575
RNF14	-0.196202	0.000390435
DNASE1L1	0.222253	0.0126024
DDX11	0.568703	4.41739e-08
HEBP1	-0.485264	2.19878e-12
GPRC5A	0.925504	6.2302e-05
MAMLD1	0.6407	6.22355e-05
CD6	-0.12104	0.539055
TACC3	0.431233	0.000239737
UFL1	0.122122	0.138502
POLA2	-0.413833	0.00027082
ZC3H3	-0.131279	0.1409
CAPN1	0.105544	0.128375
ACP3	0.612071	0.0181129
MDH1	-0.317054	3.10181e-06
SLC30A9	0.0617578	0.379997
MTMR11	0.101914	0.603964
COX15	-0.15437	0.00348908
CCDC88C	0.417014	0.00122756
YAF2	-0.125746	0.02213
ZMYND11	0.167416	0.00496213
WAS	-0.129493	0.297773
DPEP1	-0.563176	0.0617896
BID	-0.348372	2.61271e-05
MATR3	0.633367	3.22004e-07
NPC1L1	-0.314846	0.287792
XYLT2	-0.0134783	0.871971
RGPD5	0.459487	0.0963889
STMN4	-0.414473	0.208102
NUDCD3	-0.0500867	0.387487
ISL1	1.3529	0.0107593
CHDH	-0.172035	0.0857542
IL20RA	0.81869	0.0550316
CLCA1	3.32498	0.00387259
CLCA4	-0.435776	0.504626
GLT8D1	-0.164504	0.0404966
ATP2C1	0.299669	9.42851e-09
IGF1	-0.780505	8.57869e-05
SLC38A5	0.711473	0.000228487
RALBP1	0.281347	3.60456e-06
RUFY3	0.0399056	0.607362
CNTN1	1.18462	0.0038269
SLC11A1	0.144481	0.416289
WWTR1	0.21564	0.066625
AGPS	0.307944	1.27336e-07
ZNF806	0.26834	0.580733
CXorf56	0.0267132	0.725368
ATP1A2	0.134173	0.596293
TTC27	0.0477003	0.415696
ZNF582	0.161374	0.296958
VSIG2	-0.393018	0.130658
PHLDB1	0.450034	0.00120146
MARCO	-1.50173	3.30895e-08
CYP24A1	1.55258	0.000606269
PRDM11	0.280747	0.00395764
SYT13	0.896813	0.0159312
SNAI2	-0.0038157	0.987393
CD74	-0.359464	0.0161862
HGF	-0.037325	0.896664
ZRANB1	0.441984	0.000117126
NCDN	0.109867	0.220468
ADGRA2	0.229213	0.209468
CCT8L1P	-0.203904	0.678779
ZFP64	0.291466	1.29212e-09
MNAT1	-0.0618433	0.373687
SAMD4A	0.00123865	0.992494
RUNX3	0.110461	0.51428
MRE11	0.449103	1.01715e-18
PLEKHB1	1.19061	7.34934e-06
SERPINB1	-0.112251	0.222964
CYP3A43	-0.73687	0.00199293
SLC7A9	-0.197551	0.179498
SPAST	0.193627	7.80168e-05
NRXN3	0.967427	8.30601e-05
OSBPL5	0.203832	0.142702
AQR	0.263788	1.46617e-08
CPS1	-0.548913	0.0201921
C8B	-0.91255	6.45866e-11
FHL1	-0.22368	0.134922
RTF2	-0.133476	0.00661828
NLRP2	0.652626	0.0147725
SLC45A4	0.432199	0.0221893
RNF10	-0.0684968	0.133704
ZNF839	0.253916	0.00167586
ZDHHC6	0.112688	0.0462041
GRAMD1B	0.167224	0.515451
RNH1	-0.211945	0.000536208
NDUFS1	-0.0191824	0.815522
RB1CC1	-0.0122205	0.916604
ERP44	-0.375846	1.64309e-12
ALAS1	-0.307151	0.0290461
BIRC3	0.369355	0.0480147
AKAP11	0.364737	1.99098e-06
GLRX2	-0.189067	0.00474885
SNAPC1	-0.0260507	0.787729
DERA	-0.219774	0.00494227
STRAP	-0.0567102	0.322928
ABCC2	0.0271833	0.883223
DEF6	0.0248713	0.886801
PLEKHO1	-0.298241	0.0179441
GCLM	0.193627	0.111271
UBR2	0.184547	0.00125063
EHD2	-0.335681	0.00656384
DEPDC1	1.24032	8.30661e-19
CCDC28A	-0.501384	7.67216e-13
RRAGD	0.0694516	0.634586
HSF2	0.465626	9.341e-13
PHF20	0.254023	6.43665e-10
HSD17B6	-0.807866	2.64592e-06
NR1H3	-0.361856	1.55001e-07
TYMP	-0.643946	3.55209e-07
NCAPH2	-0.0488361	0.604494
TOMM34	0.00269027	0.977378
SEC63	0.0134663	0.866067
KPNA6	0.260059	1.29239e-05
VIM	-0.3359	0.00229046
RTEL1-TNFRSF6B	0.844013	3.93292e-12
FAS	-0.206833	0.153871
RNASET2	-0.623918	1.1049e-07
CD44	0.170884	0.410538
KCNG1	-0.733595	0.012361
AGPAT4	0.334526	0.0405528
SLAMF7	0.360212	0.0794316
BTN3A1	-0.0134012	0.922312
MIPEP	-0.122504	0.163808
PRKCH	-0.0755782	0.525431
INSRR	0.0346566	0.925717
IFNGR1	-0.421533	0.000207703
B4GALT7	-0.42441	3.08988e-10
SH2D2A	-0.28278	0.105558
VRK2	0.724561	1.27958e-17
TNFRSF1B	-0.382382	0.00027606
VEZT	0.392681	1.02344e-10
POU2F2	0.0968534	0.569697
BRD9	0.113302	0.0891513
SNX1	0.0242598	0.731667
TBPL1	-0.0635897	0.462447
ARNTL2	0.209483	0.21449
BCLAF1	0.165198	0.000236037
SLC39A9	-0.107479	0.0917792
ANK1	0.446879	0.0287565
IBSP	0.581697	0.120148
TFB1M	-0.241804	0.00363867
RABEP1	0.3769	1.43392e-06
HMGB3	-0.499637	0.000106154
NUP160	0.571994	3.82599e-25
BAK1	0.176106	0.0845266
MUSK	1.52725	1.58413e-05
IKZF2	0.258101	0.0644335
GRN	-0.014089	0.880843
FAM13B	0.42258	1.38416e-11
ARHGAP31	0.0192406	0.896937
CENPQ	0.581405	6.66257e-12
SARS1	-0.209483	0.00287015
RANBP3	-0.0342983	0.543641
ARID4A	0.238005	0.00310684
EIPR1	-0.111361	0.101414
PNPLA6	-0.279126	5.78701e-06
IFT88	0.0163753	0.872096
ALG1	-0.125193	0.0586347
ZCCHC8	0.334409	5.22503e-10
ABCF2	-0.346345	8.6433e-06
CHPF2	0.244558	0.000118219
LRRC7	0.438677	0.00192858
FUT8	0.513402	8.28993e-05
UBA6	0.254807	6.20116e-05
GAB2	0.257899	0.00580314
ATP6V0A1	-0.368325	2.98078e-07
PIAS1	0.452796	1.73251e-15
SLC4A7	0.657165	3.29019e-09
APBA2	0.196818	0.411531
MAP2K3	-0.474047	4.2308e-10
EFCAB1	-0.469179	0.0721492
TMSB10	-0.847483	3.13501e-08
ASTE1	0.178423	0.00018191
RNF19A	0.141187	0.141538
PEX3	-0.0482981	0.646127
GABARAPL2	-0.385949	4.25823e-14
MYOC	-0.777172	0.0539307
SH3YL1	0.225532	0.234694
FAM136A	-0.00163348	0.986862
VCL	0.392017	1.78534e-06
DEPDC1B	0.985792	2.63498e-09
DAPK2	-0.280868	0.0411502
NSMAF	0.244189	0.0043954
ADSS2	0.310854	1.6328e-06
STAP1	-0.0927272	0.71687
TIMP2	0.160775	0.379314
RFC1	0.274669	1.14695e-05
TBC1D23	0.191441	0.0010279
CUL3	0.433171	7.59413e-10
MYOM2	-1.12708	6.21735e-10
OTC	-0.591319	0.00354624
CYP46A1	-0.323979	0.0223904
ZZZ3	0.265162	2.06132e-07
SLC18A1	0.533972	0.0613441
USP2	-0.474184	0.00170912
CASR	0.62422	0.0664555
TUBG2	0.0955275	0.261138
RPL26L1	-0.579767	5.52773e-21
FLT4	-0.426005	2.82981e-05
NSUN2	-0.00366077	0.957714
FBXO42	0.0701783	0.225012
MFAP3	0.622649	2.84733e-10
MRI1	0.15852	0.0376145
METTL1	-0.169921	0.0364765
HOXC8	-0.69873	0.128074
AGA	-0.329819	0.00112565
PI4K2B	0.0259497	0.821011
BOD1L1	0.627137	4.14866e-16
MAT2B	-0.00576286	0.950793
TLL1	0.044293	0.860672
EDC4	0.544431	3.65003e-10
TRIO	0.482594	2.02945e-11
VCAN	0.279842	0.296192
CLEC16A	-0.00190456	0.983914
MSR1	0.293265	0.0318718
CDH1	-0.194085	0.196777
MTREX	0.268998	2.64289e-07
DNAH5	-0.438904	0.0450617
ZFYVE16	0.584121	6.20436e-14
RIPOR1	-0.122769	0.0857754
C6	-0.957075	5.10853e-08
RAI14	0.289873	0.000214725
SOX30	0.0412543	0.8827
PNKP	-0.163702	0.0190125
BEST2	0.360864	0.273794
PHLPP2	0.203804	0.0280869
SPDL1	0.719708	6.02161e-20
STAU2	0.00970885	0.91498
SLC66A1	-0.152793	0.0746629
CTNS	-0.0775668	0.271879
RTN4R	-0.379639	0.0106716
PHF23	-0.123157	0.0818471
CDH10	2.39374	1.08482e-05
INPP4A	0.359315	2.55529e-08
RAB27B	1.12347	1.06013e-07
PSMA4	-0.359436	7.99286e-12
MYO16	-0.238535	0.190982
LSG1	0.132194	0.0014998
PARP3	0.099771	0.241105
TNC	0.951967	2.48376e-07
THAP3	-0.419252	4.30287e-09
RIPOR3	-0.592749	0.000591446
TDP1	0.325683	9.13855e-09
AIFM2	-0.213996	0.0296337
C2orf83	0.801393	0.077123
SPATA7	-0.233906	0.00150156
MED17	0.107758	0.064226
RETSAT	-0.126936	0.22929
CAPG	0.104242	0.594782
AP2S1	-0.612961	3.84351e-16
USH2A	0.0812408	0.767943
TG	0.135807	0.63162
ADAM28	0.775802	6.97285e-05
BARX2	0.289954	0.395707
DCUN1D1	0.0410844	0.583247
JADE2	0.283255	0.000289848
ZIC2	0.654882	0.00453427
LCP2	0.208888	0.105558
TRIT1	0.0415895	0.538855
ADRB1	-0.803299	0.00040182
GUCA2B	-1.24696	1.94804e-06
CUL7	0.11033	0.165048
CTNNA1	0.018096	0.782433
PHKA2	0.291026	0.000248775
CNTLN	0.156216	0.131069
EPHA3	0.109115	0.669329
HSPA5	-0.272186	0.000203002
DSG2	0.808472	6.98128e-07
GEMIN8	-0.165412	0.00630502
OFD1	0.185397	0.00411604
GPM6B	0.434511	0.000710221
MAGEC2	1.38189	0.00402531
PREX2	0.543467	0.000408656
WDR37	0.218136	8.446e-05
YTHDC2	0.194859	0.00370983
CTPS2	0.118756	0.0937857
ATP6V1H	-0.284215	0.000146668
POLR2B	0.616334	1.48754e-17
FAM214A	0.0710264	0.46052
ARAP2	0.406951	0.000214781
TPR	0.637128	1.07888e-21
CP	-0.109628	0.577393
KATNIP	0.285508	0.00014751
DTNBP1	-0.0778808	0.456725
XK	0.218144	0.37627
ANO2	-0.949218	1.04515e-05
C12orf4	0.0973555	0.0692653
SCML1	0.315132	0.000554912
WWC3	0.307509	0.000274317
ARHGAP6	-0.141764	0.296033
FAM184B	0.215388	0.0617496
MAP4	0.137854	0.0118025
GOPC	0.156159	0.00850111
ROS1	0.625689	0.0498802
USP28	0.429981	7.58755e-15
HDAC9	0.778279	1.32255e-07
TSPAN17	-0.202506	0.00264166
NOP16	-0.638698	7.91325e-12
CC2D2A	0.301909	0.00221947
RRM2B	-0.0365629	0.716418
ZNF800	0.211655	0.000257932
TNFRSF17	-0.211776	0.554582
SNX29	0.421358	6.98009e-07
LMO3	0.274114	0.135197
MRPS10	-0.0407838	0.524558
GUCA1A	-0.802849	0.025902
RSF1	0.317829	2.29496e-09
VPS13D	0.0819011	0.27569
CELF2	0.395496	0.00804723
FAM120A	-0.0262462	0.634783
R3HDM1	0.35677	5.7163e-13
COL9A2	0.987866	2.83488e-07
KITLG	0.829156	2.77547e-11
ERCC8	0.0921726	0.10329
ADAMTS6	0.833597	1.85196e-07
H6PD	-0.243562	0.0225677
VAMP3	-0.00357031	0.969658
PER3	0.33832	0.00414846
UTS2	0.00368611	0.992204
TNFRSF9	1.07307	3.00938e-07
EPN3	0.699668	0.000548071
LTBP1	0.645399	9.33638e-06
RCN1	-0.879391	8.27878e-13
ELN	-0.217767	0.359038
RFC2	-0.0405167	0.651708
ARID1B	0.377933	3.1298e-10
CLPTM1L	-0.288809	1.35781e-05
NEDD4L	-0.117185	0.267428
FOXP3	-0.0518655	0.84505
PPP1R3F	-0.275113	0.0300674
HEXB	-0.188033	0.0112042
PTCD2	0.0341713	0.639889
NEXMIF	0.10707	0.789948
JKAMP	0.019009	0.795303
DKK3	0.237209	0.274365
ARHGEF5	-0.0362465	0.80116
NFE2L3	0.452399	0.00314129
MCUR1	-0.0344564	0.733512
LIMA1	0.452033	1.32223e-07
LETMD1	-0.0975367	0.107463
SLC4A8	0.684541	1.29067e-06
LAMC3	-0.351966	0.0725845
PTGER3	-0.419443	0.0241609
TNIP3	0.808655	0.000393387
MAPK9	0.165728	0.00238074
COL23A1	-1.28882	7.90087e-14
BCAR1	-0.129384	0.110105
FAM160A2	0.0220943	0.779841
HERPUD1	-0.502674	7.58851e-12
HOMER3	0.159292	0.31144
RAD51	0.570915	4.84268e-06
POLQ	1.2376	7.99941e-23
PIK3CB	0.203114	0.000411346
CYBA	-0.410985	0.0342902
THOC3	-0.0544639	0.501516
HEBP2	-0.629242	4.81109e-16
MPHOSPH9	0.611286	4.71154e-18
PLEKHA5	0.297138	0.000192168
PRSS8	0.180488	0.628206
SIKE1	0.167778	0.00180119
RRP12	0.0218129	0.849298
FNIP2	0.114428	0.45868
MSMO1	-0.388181	0.00145502
TTC17	0.207837	0.000627304
ALX4	0.711645	0.0120914
FSTL4	0.114774	0.698119
FOXN3	0.288179	0.000445752
METTL24	1.3064	4.82206e-10
AKR7A2	-0.436022	4.39931e-09
MRTO4	-0.123073	0.130959
NNAT	0.968154	8.14162e-09
USE1	-0.778442	1.85318e-22
MCF2L2	1.35348	1.64717e-09
NRIP2	-0.194746	0.0769478
LAMA3	0.660509	0.00107076
AP5M1	-0.0295514	0.739292
ANAPC4	0.114731	0.044498
KCNQ1	0.142772	0.455485
TRAPPC3	-0.297935	1.27509e-09
THRAP3	0.163133	2.58533e-05
PHPT1	-0.528687	4.57611e-08
ENTPD2	0.309557	0.0940575
LY75	0.324554	0.0236471
ARID4B	0.344893	1.44731e-07
OPN3	0.217025	0.116859
SDCCAG8	0.117652	0.0528457
PTPRN	0.244827	0.331143
HHAT	0.294404	0.0138232
KIF1B	0.270952	0.000252123
FOXC1	0.15831	0.45018
TBC1D22A	-0.246063	0.000105205
SYNE2	0.232988	0.0265281
PLEKHH1	0.691996	1.01659e-09
ATP9A	0.378986	0.000409585
CBLN4	-0.567295	0.0942305
CHRDL2	-0.80047	2.27854e-05
FAM168A	0.327035	8.37899e-09
RELT	0.550855	1.14132e-07
GALC	0.210831	0.140242
NOP58	0.28056	1.72962e-06
SZRD1	-0.12834	0.0271975
KCNH2	0.396113	0.223514
CUL1	0.010124	0.892659
FAM114A2	-0.0515039	0.401796
CYFIP2	-0.484017	0.00502263
TAB2	0.213184	0.00992031
GINM1	-0.295665	1.40499e-07
EIF2AK2	0.263862	1.64186e-05
USP36	0.197923	0.000929886
KMT2C	0.430586	2.50687e-09
MCOLN3	1.31959	2.49805e-05
CCDC85A	0.146503	0.534393
PUM2	0.233155	5.66086e-08
MRPL43	-0.417304	1.11334e-11
ITIH4	-1.33014	1.44436e-20
ITIH1	-0.613258	1.95791e-05
HPF1	-0.168025	0.00741083
ZFR	0.395978	1.20027e-18
ZNF280C	0.578336	6.7614e-15
NPFFR2	0.712644	0.11023
PHF21B	-0.606815	0.148238
TRAF1	0.119767	0.210298
RC3H2	0.185561	0.000625544
IL17RB	0.0589053	0.721824
TRAF3IP2	-0.0138608	0.916163
GYG2	-0.165881	0.290995
DCBLD2	0.315592	1.18603e-05
SERPINB3	2.18995	0.000937927
SOAT1	0.362386	1.4577e-07
PKP2	0.23824	0.0623585
MSH4	0.314198	0.184388
F7	-0.345194	0.0131579
GDI2	-0.0887947	0.0876874
PRDM1	0.220141	0.0905873
ATG5	-0.0735001	0.210355
TMCC3	0.107673	0.361376
PITHD1	-0.205397	0.00098702
MTA3	0.205066	0.00173469
USP13	0.294361	9.96424e-05
ATP11B	0.525996	1.7147e-11
LAMC2	0.246069	0.409606
CDK14	0.419274	1.68447e-05
SEC61A1	-0.142578	0.0218551
PPP1R12A	0.497196	1.10272e-19
RASGRF1	0.392314	0.126591
CAMK2B	-1.02731	6.5898e-05
CROCC	0.0622217	0.539774
POLR3E	0.0265408	0.672427
ATP2B4	-0.0843446	0.546319
ZC3H11A	0.822615	1.02767e-08
RIOK2	-0.0990459	0.0612416
YIPF1	-0.340839	3.90681e-10
NDC1	0.408331	2.96032e-11
DGKG	0.147593	0.437832
FLYWCH1	-0.0151399	0.863834
UNKL	0.288796	0.00334017
TBXAS1	-0.0104516	0.948956
PARP12	-0.170496	0.0484174
ALDH18A1	0.177139	0.0394817
TARBP1	0.560721	3.40065e-11
GATB	-0.381129	2.27568e-07
MXD1	0.43279	4.53563e-06
CDK17	0.299343	7.74605e-07
DNAJC25	-0.431226	1.78003e-06
SLC2A3	0.102388	0.571492
PSD	-0.252492	0.0833242
CTDP1	-0.030371	0.62378
YBX3	-0.0693427	0.717439
STYK1	1.05407	8.00717e-06
WNK1	0.474405	1.62977e-14
RPS17P5	-0.246434	0.422029
CCAR1	0.33236	1.00614e-11
OGFR	-0.3218	1.83093e-06
GNA15	-0.0101878	0.955174
CREB3L3	-0.654659	1.0077e-05
PIGV	-0.298757	0.000340192
PTPRU	0.0297273	0.880232
SNRNP40	0.155397	0.010076
RIMBP2	-0.740957	0.112808
COL11A1	1.24798	6.09785e-05
QSER1	0.607059	8.13476e-28
MPC1	-0.734134	8.00878e-14
ACAA1	-0.506012	2.86062e-06
BCAT1	0.543444	0.000101269
HDAC7	0.0581933	0.620269
LZTS1	-0.0172555	0.921452
PRDM6	-0.170238	0.373255
SPAG4	-0.229127	0.16736
NCKAP1	0.436565	7.78137e-14
MRPS35	-0.0662283	0.269344
GUCY1B1	0.150977	0.284087
SFSWAP	0.160527	0.00125144
TNK2	-0.0383831	0.70821
MON2	0.293462	2.86989e-07
CDH3	0.212059	0.424049
ARSF	-0.537718	0.174638
GPBP1	-0.00857222	0.874437
DGAT2	-0.174449	0.291868
ZNF112	0.659622	1.44141e-10
CS	0.289173	1.4471e-05
LTK	-0.072206	0.771809
MRPS24	-0.0177105	0.917431
ELMO2	0.307937	2.18352e-10
WAPL	0.313229	3.26199e-12
VMP1	-0.12175	0.089136
APPBP2	0.272608	2.2185e-06
POLD1	0.751498	3.27861e-25
SEZ6	1.67189	4.90406e-07
EIF4B	0.159825	0.0154479
SLC6A16	-0.361654	0.00762167
BICRA	0.0606247	0.339478
SPHK2	0.182972	0.0776347
RPL18	-0.654301	8.61699e-12
CA11	0.438713	0.0045472
ISOC2	-1.03801	3.1704e-34
U2AF2	0.223376	1.18748e-07
EPN1	-0.398466	4.35767e-11
MED29	-0.228803	1.88783e-06
AHRR	-0.0903628	0.784231
GSC2	-0.553862	0.22575
ZNF275	0.0937977	0.379731
MTMR1	0.37341	1.41453e-09
GPC1	-0.478162	0.00118362
ADCK1	-0.25718	9.66947e-05
HAGH	-0.773304	6.77869e-14
RNF4	0.282442	1.69932e-08
CASP8	0.320918	1.79654e-07
LIMCH1	0.346251	0.0419257
INTS13	0.137165	0.0412925
TM7SF3	-0.147777	0.12857
DLX3	0.299147	0.516727
SPA17	0.306821	0.0109494
TSPAN32	-0.0213339	0.910646
CCN5	-0.982221	8.57689e-05
DMRT3	0.055559	0.935444
ST3GAL6	-0.523012	5.81866e-05
ATP2C2	-0.0461027	0.899589
NGFR	-0.343871	0.108633
CDON	0.871992	1.11417e-12
TAF2	0.496651	1.99912e-09
HIPK2	0.278739	0.00638349
TNPO3	0.195012	9.54215e-05
BORCS8-MEF2B	0.610647	0.0443402
RFXANK	-0.236868	0.00279136
TMEM161A	-0.386221	5.5833e-08
LPAR2	0.230731	0.24691
CTSA	-0.173845	0.0450396
SUGP2	0.326847	3.05476e-08
SLC12A2	0.674925	9.01871e-06
SNX24	-0.175231	0.00684932
EYA2	-0.0373662	0.902596
CNN2	0.194281	0.0637188
ABCA7	0.0479898	0.744502
SNCAIP	0.886617	3.39916e-06
DDX20	0.294514	2.30657e-10
BTBD1	-0.0814515	0.175995
FAR2	0.623576	1.33881e-06
BCAS1	0.671248	0.0128919
POU1F1	-0.406928	0.0369312
CHI3L2	0.633732	0.00433474
SBNO2	0.0993203	0.184368
PMS1	0.311318	3.89602e-11
HMG20B	-0.343108	2.29496e-09
CALCRL	-0.0847316	0.600309
TAF11	-0.0693593	0.30475
ANKS1A	0.338449	1.70193e-07
AP3D1	0.104383	0.109325
ZNF76	0.012906	0.866331
SLC9A3R2	-0.799343	2.55555e-16
NTHL1	-0.844576	4.03534e-18
UHRF1BP1	0.595434	1.49043e-18
GNAI3	0.110119	0.0253848
IPO5	0.305194	4.1644e-05
OAT	-0.678364	0.00445252
WDR3	0.31016	3.64138e-05
PKN2	0.365453	7.26815e-09
WDR18	-0.376403	8.8681e-08
TRAM2	0.219914	0.00419804
NTN1	0.14943	0.404747
GLP2R	0.597115	0.0410186
MCM10	1.12938	2.26528e-16
DGKA	0.416057	0.000848894
ERBB3	0.00870955	0.944595
ROPN1	0.216029	0.601743
ANKRD44	0.231635	0.0103871
KARS1	-0.346904	3.92205e-09
ADAT1	0.0809811	0.2676
PDIA5	-0.267538	0.00090347
TBC1D22B	0.252293	0.000193073
NDUFB4	-0.40464	9.18723e-15
SPEN	0.475098	4.34637e-13
MYLK	0.0844952	0.597731
ZC3H15	0.135214	0.00327082
MAP2K4	0.0216116	0.78456
PACC1	0.223431	0.00309213
SNAP91	0.814902	0.0980205
SLK	0.317563	2.63521e-08
CYB5R4	0.238031	0.00036768
COL17A1	0.0707302	0.779154
GSTO2	0.0560328	0.797553
SEC61A2	0.0660813	0.49146
PRKCQ	0.325316	0.0598454
TLE2	-0.310652	0.0166108
ASB1	0.0775462	0.35962
FAM107B	0.0564672	0.537731
ME1	0.232651	0.257831
TBC1D1	0.204907	0.0163541
CDK13	0.295844	7.2811e-10
MTHFD2	0.269671	0.0617688
SLC9A7	0.132757	0.218412
FOXJ2	0.1486	0.0259896
YBX1	-0.045458	0.574727
PDE4A	0.171315	0.299681
PPP2R5A	-0.184116	0.0142116
CTNNA2	0.154277	0.774144
ELAVL1	-0.0157418	0.783708
TIE1	-0.465907	6.95755e-06
DIP2B	0.414212	3.55572e-14
SMARCD1	0.307931	3.57983e-09
KDM4A	-0.0473799	0.480308
NFYC	-0.0660501	0.23921
ZMYND12	-0.585606	0.000143121
SLC9A3	0.0898576	0.774008
NGEF	-0.180686	0.0462508
ASPM	1.0781	1.1087e-16
CD84	0.49725	0.000467922
ELOVL1	-0.0324332	0.660089
SPI1	0.144691	0.31036
POLR1H	-0.513218	1.08092e-08
MPPED2	-0.219179	0.288259
CLDN18	2.26365	3.78179e-16
ZBTB11	0.390033	1.66557e-17
ATXN3	-0.156721	0.00873877
GOLGA5	-0.0504694	0.449022
FGFR2	0.458244	0.0769115
LRRC40	0.323647	1.76167e-05
ISOC1	-0.147099	0.0866831
EML1	0.120832	0.35843
TRMT11	0.0787037	0.413773
THUMPD1	0.198056	0.000329346
MSANTD3	0.0629582	0.473502
KIF26A	-0.0587524	0.770301
ATG2B	0.148353	0.0617655
ARFGEF1	0.150524	0.0317959
ACSM2B	-0.90113	5.06019e-08
ZFAT	0.105467	0.154066
MTFR1	-0.239493	0.00462096
STAG3	-0.655523	9.92752e-07
FECH	-0.0311629	0.745915
MYO9A	0.543911	2.80236e-07
DDX3Y	0.245947	0.513811
PFKP	0.657183	0.000707942
IDI1	-0.173402	0.118376
SP100	-0.234802	0.000245022
KLF6	-0.273694	0.0132751
PLPP1	-0.179289	0.160277
NEO1	0.345805	0.000156799
TRAM1	-0.0888103	0.318103
PHKA1	0.26963	0.0963483
TNFRSF1A	-0.433688	6.82308e-15
CACNB1	0.502598	3.55004e-05
EVI5	0.278616	4.13056e-05
STOML1	-0.361837	4.48268e-07
PKM	0.656559	9.89938e-05
DHX29	0.0149615	0.821238
DNTTIP2	-0.0488656	0.410514
METTL22	-0.226039	0.000139552
TP53BP1	0.845219	1.08452e-19
TRO	-0.0569325	0.788025
RRP15	0.138024	0.034498
RHOA	0.0500358	0.289877
DHX8	0.179781	8.26219e-05
PMS2P4	-0.0992283	0.222642
PRKCZ	-0.11836	0.417016
ZFY	0.398082	0.255923
IARS2	0.120199	0.107193
SYT1	0.929805	0.000260481
NAV3	1.08239	1.70829e-06
IDH3G	-0.491327	3.79779e-11
ROGDI	-0.700182	1.80782e-16
PDZD4	-0.715584	4.62795e-06
ATP2B3	0.151139	0.683847
ROCK1	0.413231	5.72031e-11
CBFB	0.249296	0.000151159
PDK3	0.0952939	0.448608
HYAL2	-0.21624	0.000579924
HDAC4	0.434545	2.67566e-08
RASSF1	-0.00819274	0.919559
FGFR3	0.332751	0.02608
IFI35	-0.509349	5.70184e-07
HEATR6	0.273488	7.26052e-07
COASY	-0.328105	9.68637e-08
PLEKHH3	0.0966612	0.321417
MEF2A	0.39106	2.11665e-06
OTUD5	-0.19087	1.46889e-05
TFE3	0.128241	0.0169563
TBC1D25	-0.091179	0.0975816
ACSL4	0.260184	0.259298
INPP5A	0.329494	9.9037e-07
GPKOW	-0.18101	0.00167683
GRIPAP1	0.0273413	0.614267
FTSJ1	0.0153584	0.842747
PRR11	0.691607	3.23041e-07
REEP1	0.286467	0.223245
ATP11A	0.52019	5.20251e-08
POLR1A	0.323496	1.27974e-10
LAPTM4A	-0.0998524	0.0839625
TTC7A	-0.122399	0.189918
IP6K2	0.158086	0.012381
STON1-GTF2A1L	-0.410076	0.443739
SRBD1	0.070923	0.279355
KIF2A	0.510626	7.95735e-20
RASGRP2	-0.590149	5.07297e-05
PSME4	0.0624335	0.247777
IFT80	0.586178	7.63867e-10
SIRT2	-0.312288	5.3362e-08
ERLEC1	0.0399726	0.513835
PPP2R5B	0.0125602	0.877572
PYGM	-0.24574	0.0640232
PAGE1	3.33953	6.33188e-11
PITX1	0.798293	0.0111855
TRPC7	1.10506	0.00151427
MAST4	-0.00124136	0.993259
ADGRF5	-0.149574	0.195459
SDK2	-0.920715	0.000780089
NUP133	0.232874	2.00344e-05
NUCKS1	0.0149956	0.854202
VPS35	0.179457	0.00358978
DNAJA2	-0.322732	2.48157e-06
BCL3	-0.325932	0.00167075
KCNAB2	-0.41813	0.0208136
ABCC9	-0.0515889	0.817706
GAL	0.24697	0.5907
CLEC2D	0.322496	0.0166147
FUNDC1	-0.0314948	0.708833
MAOB	-0.40679	5.0751e-05
RORA	0.0786506	0.603657
DRD4	0.102018	0.595299
TGFBR3	-0.1078	0.513547
PLA2G10	0.620008	0.00558211
HES2	-0.122321	0.672064
ATP1B3	0.186665	0.14297
NEDD4	0.304425	0.0114786
PIGB	0.154867	0.0415779
MAPK6	0.390327	8.49621e-09
GNB5	-0.285742	0.0098636
RAB27A	-0.0704933	0.547933
HDHD5	-0.28998	1.85434e-06
UFD1	-0.234259	7.36983e-05
LRP6	0.00903455	0.941901
GUCY2C	0.344554	0.353355
SCT	-0.406716	0.0633507
PHRF1	0.172893	0.000678084
ELP1	0.485187	5.36442e-08
NUCB2	-0.150535	0.150932
PFN2	0.752688	5.52364e-05
PTPN3	0.00622548	0.955963
SPTB	0.596683	0.000453835
DAPP1	0.478328	0.00255706
FGF10	-0.274627	0.430502
SLC44A1	0.0121903	0.90176
TMEM260	0.121064	0.135598
SMG6	0.636689	1.40473e-10
EXOC5	0.255076	6.24568e-06
CLTCL1	-0.267274	0.0484422
FGF22	-0.0671189	0.807859
FSTL3	-0.462568	0.0173071
DGCR2	0.00054597	0.994569
RNF126	-0.308697	1.23643e-06
MNT	0.151932	0.0122679
ZXDC	0.148291	0.00521664
JMJD6	-0.160152	0.0506873
POLB	-0.293972	0.0059921
ST6GALNAC1	0.128153	0.602765
WIPI1	0.0860205	0.501283
FRMPD1	0.0686366	0.821414
GBA2	0.131698	0.0298153
NDST1	0.0969942	0.287651
ASNS	0.833157	8.64716e-06
AP3M2	0.383886	1.68168e-06
CNGB1	0.140487	0.631138
ST6GALNAC2	0.735212	0.000419757
CHAT	0.226884	0.80376
PABPC1	-0.0619647	0.624644
TESK2	0.182768	0.0628207
CFAP20	-0.365889	1.16133e-10
CSNK2A2	-0.106426	0.105673
PTPN21	0.180133	0.0547762
EIF2B3	-0.344335	3.61819e-07
CAMK2A	-0.269607	0.398666
TCOF1	0.188184	0.00907421
CDC42	0.0047872	0.941721
OSBPL3	0.666995	4.379e-10
EPHA8	0.289908	0.427647
SLC12A3	0.195314	0.425165
RAD18	0.334485	8.47745e-09
ATP2B1	0.615294	1.48993e-15
TRPM5	1.10606	6.82208e-05
NCK2	0.453614	0.00141177
MAP4K4	0.354552	2.40921e-07
MGAT4A	0.322341	4.33125e-05
RPL31	-0.521919	5.74778e-10
WDR1	0.063613	0.310584
SNX13	0.318611	6.08377e-08
ARHGAP10	-0.362416	0.0101513
RPS6KA2	-0.236974	0.0877239
ING3	0.257687	2.91101e-06
VASH1	0.192889	0.0973569
LMCD1	-0.190908	0.0839979
BUD23	-0.255712	3.56257e-05
SEL1L	-0.0892047	0.3281
TRIP13	0.918764	2.6376e-11
ATP6AP1	-0.0806774	0.261638
TCF3	0.360856	4.03669e-07
TRIB2	0.416699	0.00267467
DAZAP1	-0.037458	0.497781
MBD3	-0.376353	3.79161e-07
HLTF	1.15847	1.01208e-17
FAM50A	-0.364262	0.000151602
FAM3A	-0.347338	4.22045e-06
CPSF1	-0.0592568	0.517433
MYO3B	0.334861	0.215237
CYBRD1	0.0279802	0.889481
CDH19	0.279045	0.398738
PDCD2	-0.0910461	0.194242
SLC6A15	3.6518	8.35714e-11
RDH11	-0.301182	0.00050593
PRKACA	-0.415877	7.84292e-08
ADGRL1	-0.440063	0.0237854
SPP2	-0.992119	2.57379e-05
ACTN1	0.0825381	0.373785
ZFYVE26	0.342883	6.64348e-12
RPS6KA6	0.622399	0.101124
EPN2	0.766258	1.25382e-12
PTPN18	-0.217046	3.53821e-06
LIMS2	-0.627159	3.94309e-09
ASIC4	0.299772	0.283428
SPEG	0.497258	0.0373271
LNX1	0.51371	5.42262e-06
ALDH3A2	-0.262541	0.0179143
TFRC	0.351066	0.000267578
SREBF1	0.0402083	0.802059
TRPC5	0.302032	0.362003
AFF4	-0.206894	0.00535755
UBE2D1	0.251782	6.44593e-05
MPP5	0.0868729	0.224315
RHOBTB1	0.82163	7.55674e-05
SMC1A	0.561616	4.01143e-17
HSD17B10	-0.658367	5.02495e-15
MARK2	0.31305	1.20375e-08
HMMR	0.855861	3.10098e-12
CHFR	0.296486	9.89035e-05
TRHDE	1.13449	0.000701016
P4HA2	0.0488145	0.726079
FCGR2B	-1.00197	7.38361e-07
NFATC3	0.551641	6.00923e-09
TRNT1	0.0631876	0.288357
ACADVL	-0.53561	2.62725e-10
STK10	0.0406175	0.669928
FBXW11	0.217297	0.000202876
ACAP1	-0.192503	0.175868
CRMP1	0.135016	0.514229
EVC	0.511153	0.025991
DERL2	-0.447907	3.86248e-12
SIDT1	0.270175	0.0927172
NDE1	0.609771	1.04926e-16
IRAG1	-0.261996	0.0571509
TMEM38A	-0.283693	0.00933825
AP1M1	-0.254072	1.58617e-05
PVR	-0.24441	0.00173618
XRCC1	0.0129437	0.882878
SCARB1	-0.215392	0.0308879
CYP2W1	0.771151	0.000361581
MCM2	1.52264	4.17922e-30
MOV10L1	-0.318014	0.0915371
PANX2	-0.565238	0.00307822
SELENOO	-0.640411	3.37761e-14
TP63	0.191306	0.415904
ALPK1	-0.0503319	0.694482
LLGL2	0.00352776	0.976098
PDE8A	0.0288962	0.728816
CLCN4	0.24099	0.0021628
NLE1	-0.160546	0.0956794
SDHA	-1.09825	2.41888e-32
SMARCE1	0.117565	0.157279
FNDC8	0.429793	0.115982
GSDMB	-0.248435	0.0514128
KDM5A	0.23147	9.01666e-06
ADAM11	0.690577	0.000316183
PPP2R3A	0.156293	0.333819
FERMT2	0.0125729	0.905967
ABCB11	-0.225098	0.374351
DHRS9	0.0208437	0.919822
CD5L	-1.09415	4.69817e-05
PTGS2	0.0709322	0.778707
IGF2BP2	0.695199	0.00135457
MAP3K13	0.0173032	0.874725
ST6GAL1	-0.213138	0.0542515
TBX21	-0.0995248	0.570688
VDAC1P1	0.253476	0.0542602
FRY	0.092645	0.416373
PICALM	0.148394	0.00209249
NSF	0.073296	0.190583
GLI2	0.468872	0.0406246
CLASP1	0.228385	1.24918e-05
MRPS34	-0.738708	2.17203e-21
NOTCH3	0.0432096	0.802458
CLNS1A	-0.296076	1.4184e-06
PPP2R2C	-0.290366	0.499179
TEAD2	0.264074	0.0624242
EED	0.223289	1.22678e-05
CDHR2	-0.494717	0.0944619
SNCB	0.0941076	0.819417
TSG101	-0.00832162	0.881864
NCBP3	0.169328	0.00440012
ATP2A3	0.145133	0.388259
CA12	0.223787	0.492202
MGLL	-0.128697	0.378725
NTN4	0.107784	0.489467
BCS1L	-0.331762	2.14158e-08
NUAK1	0.496072	2.19192e-09
DPP8	0.368272	6.40082e-13
SLC24A1	0.388144	3.11637e-05
ZNF532	0.626885	7.05195e-08
SCARF1	-0.189206	0.0163897
LMAN1	0.0327783	0.737251
HACD3	-0.024143	0.804575
IPCEF1	0.164937	0.323504
ZZEF1	0.213824	0.00173196
NOX3	0.836938	0.286456
ENO1	0.0624629	0.619205
SLC12A1	-0.525256	0.212121
MYDGF	-0.616025	8.11283e-19
ANO8	0.49766	3.46401e-07
TUBE1	-0.4725	3.90567e-06
ARHGEF10L	-0.0291468	0.783298
TXK	0.161189	0.261336
WSCD2	-0.246478	0.294447
KCNQ2	-0.411576	0.228678
TACR2	0.583298	0.00207571
ACTR6	0.19274	0.000496607
TIPIN	0.244562	0.00126618
SRI	-0.240937	0.0348456
EIF4G3	0.163255	0.0231091
NUP37	0.3693	6.57139e-10
SEMA3A	1.28528	1.5247e-09
GTSE1	1.21677	1.61114e-19
SEMA3C	0.748653	0.00231995
TTC38	-0.433836	5.20286e-06
ACAT1	-0.694359	8.94473e-13
GRAMD4	-0.714196	3.46104e-07
CELSR1	0.369778	0.0164734
WNT8B	0.640151	0.0317335
ZNF638	0.0876191	0.0311699
SLC25A40	0.328431	2.31397e-07
TIMM21	0.00275695	0.971838
ADD2	0.0525653	0.826405
FGF4	3.12637	2.80476e-07
RASAL2	0.548008	8.74236e-09
VPS9D1	-0.471181	4.18778e-10
ZNF37A	0.468863	2.70972e-14
MARK3	0.0448441	0.405653
SLC25A3	-0.276754	8.27243e-07
FNDC3B	0.346003	1.05646e-05
FOSL2	0.0217234	0.877308
CACNG5	-0.0227211	0.960446
CACNG4	0.973125	0.00532279
FRYL	0.351857	4.1079e-09
TMEM131	0.278012	8.94242e-08
FSCN1	0.361513	0.00843359
ACTB	-0.187156	0.00270186
MOCOS	-0.249271	0.0148248
PLD1	0.0578202	0.709644
ATP12A	1.38314	0.0106361
WDR62	0.783384	2.69159e-10
DLG1	0.325428	6.01052e-10
RAB7A	0.0262522	0.575755
BCAP29	-0.299235	0.000611693
SEC31B	-0.129491	0.3128
SART3	0.319367	8.43963e-20
ARHGAP15	-0.307671	0.0191686
TUBA3D	-0.053007	0.849858
PAX2	-0.663893	0.0986937
EXOSC7	-0.282303	9.76824e-06
KIFAP3	0.00393947	0.970506
MKRN2	0.359564	1.12119e-13
MCM6	0.76544	1.1266e-17
REXO2	-0.270112	2.00234e-05
RBM7	-0.0808111	0.173127
RBMS2	0.156607	0.16026
BAZ2A	0.654426	9.16461e-29
PTPN23	0.365583	2.964e-15
MLH1	0.177044	8.01166e-05
UNG	0.222632	0.000186631
FMO4	-0.173541	0.275717
KLHL20	0.24367	0.00366787
RGS11	-0.215446	0.353087
SLC46A1	-0.161294	0.0895976
PLXNA2	0.101326	0.242681
SPAG5	0.440907	0.000144647
ANKRD13A	0.148249	0.0215266
TPD52	-0.0843629	0.471244
ACACB	-0.186362	0.15574
TRAF4	-0.205226	0.0025235
PAG1	0.471844	0.000607352
GPATCH1	0.138046	0.0123032
ICAM3	0.291135	0.0895738
NT5C2	0.73514	1.1842e-11
MCAM	0.168597	0.143963
GPC4	0.339984	0.186991
MBNL3	0.599653	5.82787e-05
CAMSAP3	-0.0978313	0.348448
RAP1GAP	0.109258	0.579074
XAB2	-0.319604	1.8878e-07
ARHGEF1	0.063604	0.324209
STXBP2	-0.401547	1.18439e-05
MAP2K7	-0.152922	0.00318641
NMRK2	-1.34802	0.000366402
DGKD	0.369155	2.08898e-08
CTTNBP2	0.241068	0.427572
ACTL6B	0.30047	0.197613
RARB	0.199069	0.192397
TOP2B	0.364469	1.31281e-15
TM9SF3	0.0154572	0.788963
NFKB2	-0.172962	0.044939
UBE2T	0.489268	1.45338e-05
PPP1R12B	0.0787674	0.437321
DNAJC10	0.347539	3.29437e-07
GTF3C1	0.0732882	0.197953
IL4R	-0.120759	0.232968
USP33	0.297583	3.30814e-08
PAK3	-0.016448	0.969616
CAPN6	2.28095	4.22486e-11
DCX	0.279276	0.387059
SNRPA	-0.340615	1.87602e-05
SPAG6	0.887164	0.000591381
EXOSC5	-0.55037	1.83382e-11
DYNC1I2	0.262787	9.91785e-05
APBB1IP	-0.0845736	0.642749
LRCH4	0.453736	6.22445e-07
FAM76B	0.294779	0.000190732
SIRT6	-0.357855	8.78733e-07
TYR	1.64449	0.0274902
POLD3	0.358302	1.72243e-06
ACTN2	0.927414	0.00124861
CAPZB	-0.119047	0.0288301
GPR137B	0.0979846	0.523874
NAALAD2	1.04654	1.05175e-08
JADE1	-0.110771	0.207285
SLC25A43	0.195343	0.02152
UBE2A	0.00553174	0.945273
FGFR1	0.48202	0.00533187
FKBP6	-0.103705	0.735742
SMC1B	1.21173	4.08543e-07
FBLN1	0.706085	0.000326512
ITGA8	0.276201	0.0680249
CST7	-0.38194	0.0245996
MAP2	0.196451	0.319032
PIAS2	0.128409	0.0161671
AMPH	0.714435	0.00060823
ARAF	-0.332165	1.2478e-07
MCCC1	-0.108048	0.286982
LAMP3	0.728334	1.38994e-05
FAP	0.396621	0.0797932
NEBL	0.768233	0.00242484
ACER3	0.0689373	0.438003
UBE2K	0.100844	0.0731947
PIK3C3	0.197781	2.6984e-05
N4BP2	0.601585	8.00497e-11
TIGAR	-0.170072	0.112102
TULP3	0.277165	6.70529e-05
SYNJ2	0.390316	9.551e-05
ADCY2	-0.037921	0.917096
PPP2R5C	-0.201866	0.000277442
PMS2P1	-0.374971	1.64804e-09
RBFOX1	0.204234	0.523307
GNB1	0.0880142	0.10665
HOXA9	-0.391844	0.139492
EDN1	0.169378	0.347111
MLLT10	0.488623	3.66867e-14
ZCWPW1	-0.617554	1.60505e-09
ADCYAP1R1	7.51602e-05	0.999756
FGF20	1.73654	2.28459e-06
P2RY10	0.41721	0.0330905
ITM2A	0.237312	0.162126
NRDC	0.00275604	0.969748
VDAC3	-0.214406	0.00979618
PCM1	0.156212	0.108517
TNRC6C	-0.0861135	0.473078
CBFA2T2	0.443877	4.89457e-12
BRINP1	-0.457295	0.142382
ITCH	0.126389	0.0765397
PKD2L2	0.219343	0.32593
TP53INP2	-0.166713	0.137078
SDF4	-0.259553	1.56616e-05
MYH7B	0.700645	2.02151e-05
BPIFB2	0.171665	0.709481
TP73	0.880975	2.95074e-07
TOLLIP	-0.308107	2.62677e-07
UBE2D4	-0.558228	1.71032e-15
CLUL1	0.602937	0.00884267
RUNX1T1	-0.270988	0.0843158
CDH17	1.83788	1.32442e-08
THOC1	0.217153	0.000411081
FKBP7	-0.093481	0.338805
OSBPL6	0.472577	0.000970614
SLC1A3	0.546848	0.00037288
XRCC5	0.0771883	0.104944
LXN	0.0327213	0.865716
SP140	0.409572	0.0223321
MKNK1	0.0793261	0.11807
TNS1	0.166143	0.0900297
REXO1	0.203476	0.00677102
SAR1A	-0.111829	0.0169477
CDC14A	0.810963	2.72737e-16
RAPGEF3	-0.693473	1.87152e-13
CEACAM1	-0.348006	0.00213386
SENP1	0.534853	4.27287e-31
DUSP13	-0.323194	0.354088
CIC	0.300308	8.4456e-08
LIPE	-0.205532	0.185045
FDFT1	0.0325373	0.80369
PAFAH1B3	-0.0709346	0.729071
OPHN1	0.466222	0.000694865
AFM	-1.04965	8.14478e-09
KIF22	0.11146	0.22024
SCGN	-0.183636	0.542476
CARMIL1	0.578371	2.7778e-05
PGM1	-0.343481	0.000208679
DDX1	0.0691082	0.167132
DNM2	0.132556	0.0222484
EPB41L2	0.642367	6.52526e-12
RIMS1	0.262843	0.401915
MOXD1	0.119429	0.671567
STX7	0.194284	0.00536107
RABL2B	0.101853	0.123816
KEAP1	-0.289854	6.40947e-07
DDX43	0.399922	0.155075
PTPRH	-0.518863	0.00176848
DCT	0.505343	0.0489228
SLC35C2	-0.204088	0.000120762
CRYBG3	0.829952	1.13998e-06
EPHA6	1.06217	0.0201606
SCTR	0.153945	0.574781
RFX3	0.613799	1.72871e-14
RIF1	0.502561	3.22913e-20
RAB21	-0.000774198	0.989841
SLC4A4	-0.0720071	0.759402
SMARCA2	0.124449	0.265695
RDH8	0.716912	0.0844044
SESN1	-0.221445	0.0147908
MID2	0.17189	0.145659
COL5A3	-0.115444	0.569342
SRCAP	0.196841	0.0162583
PUM3	0.0961199	0.263513
CPB2	-0.603335	2.82486e-06
CHRNA3	0.984399	0.000948489
KCNN2	-0.687128	0.00518607
CNOT4	0.0942672	0.0428896
PSEN1	-0.0346355	0.556236
CPOX	0.0775012	0.309706
CLDND1	0.0428036	0.440221
MOK	0.192097	0.0520178
HSP90AA1	0.0165391	0.862423
RBL1	0.768394	2.44661e-17
DLGAP4	-0.0272398	0.740265
IGSF9B	0.24318	0.242594
CFHR2	-0.96855	1.33276e-09
CROCCP3	0.677977	3.80268e-14
NDC80	0.744194	1.92145e-09
AP4E1	0.375469	4.95782e-14
RSBN1	0.289318	7.07011e-07
MAGI3	0.487387	8.24423e-09
CXCL2	-1.03469	1.60926e-09
AFP	0.426425	0.291441
COL4A4	0.18746	0.366495
TCF7	0.361288	0.0247613
OSTM1	0.146563	0.110994
CDH7	1.47699	0.000336034
IMPG2	0.340861	0.00909579
PCNP	0.236014	2.11518e-10
EXD2	0.27694	6.89882e-06
ARG2	-0.153377	0.513508
MEF2C	-0.165077	0.0956784
PTPRC	0.74678	1.55205e-06
CACNA1S	1.21625	7.42157e-08
PKP1	-0.379442	0.182487
UBA5	-0.0398177	0.469326
STK17B	0.307319	0.0196877
CDC14B	-0.0628299	0.683742
ZNF510	0.453362	2.57111e-09
LRP2	0.395184	0.288329
ZNF506	0.624412	4.4647e-08
JMJD4	-0.411523	3.34506e-07
DUSP12	0.189533	0.00272483
AACS	0.255138	0.0121905
DELE1	-0.165195	0.00513285
SLC13A1	-0.671247	0.25476
CADPS2	0.185959	0.0762149
PCDHB4	-0.0655949	0.75519
PCDHA6	1.57599	1.59923e-05
PCDHGA2	0.136386	0.619915
HSPB11	-0.147888	0.0424766
PHLPP1	0.0740279	0.495265
ATP8B1	0.25151	0.0129982
IL12RB2	0.412045	0.0351862
SMARCD3	0.156227	0.413868
WDR70	-0.173763	0.00134513
FYB1	0.565989	0.000153495
MPP4	0.384429	0.0829507
STRADB	-0.169413	0.01285
BZW1	-0.0359207	0.617121
PGR	0.0706928	0.824764
C1QTNF3	-0.00186467	0.994784
ME2	0.35053	1.79454e-06
C5orf22	0.2765	7.28003e-08
CCNT2	0.26247	1.88425e-05
FAM135A	0.476798	1.68348e-07
COL19A1	0.407514	0.16057
EPB41L3	0.333086	0.0344908
COBLL1	0.0945004	0.509738
DLG3	0.428069	0.0223042
KCNK2	1.76663	4.03513e-05
SERTAD4	1.01646	4.42427e-06
TRAF5	0.453241	3.39052e-05
MRPL22	-0.521149	7.80318e-17
GEMIN5	0.319095	1.20951e-10
OPRK1	1.13347	0.0264631
NFE2L1	-0.00789124	0.943654
SEMA5B	0.445956	0.00034689
GSK3B	0.182255	4.81885e-05
ITGB5	-0.0956021	0.257882
ERC1	0.268712	3.60649e-05
XPO1	0.280142	1.08634e-11
LINC01587	0.0535365	0.904353
RNF13	0.0348567	0.602714
TRPM3	0.677894	0.00615
PALB2	0.383742	1.21841e-11
DOP1A	0.549969	1.30225e-09
LYRM2	0.0158574	0.831106
BCKDHB	-0.166747	0.17353
KAT6A	0.443496	5.98963e-09
TUT7	0.0138376	0.919162
ULK2	0.052987	0.781524
GRHL2	0.432773	0.203544
TNPO1	0.296839	2.43088e-09
PLOD1	-0.168928	0.0696391
P2RX5	-0.104476	0.705686
ITGAE	0.0818995	0.556787
DIS3	0.0710762	0.307959
PIBF1	0.141624	0.0503871
TDRD3	-0.21124	0.000978712
AC000061.1	-0.876519	0.189242
NUFIP1	0.0122619	0.883691
PDS5B	0.357009	2.51634e-10
OXCT1	0.639699	0.00328949
RRAGB	0.205512	0.0037436
EPYC	1.01366	0.00376028
CYLD	-0.0258722	0.753503
SLC27A5	-1.23085	6.14249e-12
ZNF324	-0.019608	0.808046
ZNF671	0.0610666	0.692455
ZNF416	0.0965349	0.26702
ZNF586	0.212511	0.00375968
ZNF446	0.032102	0.632104
ZNF264	0.241707	0.00085553
RPS5	-0.508155	3.78979e-07
FAT1	0.330583	0.0132228
YTHDC1	0.199652	7.9008e-07
CHMP2B	0.18873	0.000550215
SMAP2	-0.126957	0.045437
PPIE	-0.234208	0.00011035
ZMPSTE24	0.0299682	0.659123
STARD7	-0.049331	0.341614
NOA1	0.123463	0.0543615
REST	0.379287	2.37164e-13
HAL	-0.456917	0.0641823
SSH1	0.323439	1.09264e-08
GSTP1	0.25236	0.185868
APLP2	0.0773508	0.318083
FAM234B	0.150843	0.129298
SLCO1A2	0.733601	0.000117986
WBP11	0.205205	2.92122e-05
EIF3I	-0.370502	1.07274e-08
NKAIN1	0.766598	0.0121929
COL16A1	0.309291	0.145631
TXLNA	0.0408261	0.569035
APOB	-0.219774	0.0873214
NCOA1	0.207394	0.000545167
AGBL5	0.176194	0.0238389
EFR3B	0.575457	1.17589e-06
KIF3C	0.638711	4.46241e-05
RAB10	0.136849	0.025492
GCKR	-0.552238	0.000113277
HADHA	-0.296312	2.89155e-07
MAPRE3	-0.298743	0.000633443
CAD	0.534435	3.14616e-14
CD59	-0.45856	1.1258e-09
CD82	-0.235067	0.0143769
BCORL1	0.624813	3.04563e-11
ATRX	0.46543	2.8247e-13
AK6	-0.360718	3.45037e-10
FCN1	-0.294449	0.0860563
MYNN	0.0566812	0.247775
MECOM	0.669717	2.36446e-07
SCAMP1	-0.0118428	0.894071
PREP	0.0129993	0.870653
HACE1	0.711971	7.04081e-15
SEH1L	0.127185	0.0110231
WDR47	0.468975	1.44313e-11
WDFY1	0.25855	5.08531e-07
OVGP1	0.073901	0.71211
SLC25A24	0.740259	3.67669e-06
MAP3K4	0.25005	1.49526e-05
PILRA	-0.0243494	0.87271
IGSF9	-0.184485	0.512143
ABCB1	-0.0418469	0.849059
ZNF213	0.147596	0.148384
AKR1B1	0.292174	0.117931
CPNE3	-0.049972	0.565912
RRN3	-0.0818658	0.24978
CTTN	0.12508	0.0684414
WNT11	-0.632578	0.0037002
MTIF2	-0.114991	0.019347
DDHD2	0.364016	8.09094e-06
TTC39A	0.323892	0.138968
EPS15	0.0982765	0.0667787
ORC1	0.991182	1.38388e-15
MGST2	-0.700999	6.86778e-17
CHERP	0.39511	1.50556e-06
ATG16L1	0.0699943	0.131625
USP40	0.044719	0.513612
POMGNT1	-0.207284	0.000595817
RAD54L	1.22983	6.30185e-17
MAST2	0.235938	0.000840663
DNAJA1	-0.232694	0.000918723
B4GALT1	-0.204441	0.0040463
CHMP5	-0.0795276	0.159858
NFX1	-0.00866906	0.904956
AQP6	-0.223653	0.582639
DIMT1	0.374564	2.18338e-05
IPO11	-0.0226167	0.687928
FOLH1	-0.276518	0.0880453
EIF2AK1	-0.075699	0.141538
NME8	-0.436747	0.0218019
EPDR1	0.0505013	0.758951
SNX10	0.108855	0.474519
SEPHS1	0.0141887	0.821384
MRPL28	-0.813769	1.45807e-25
HBQ1	-1.38938	0.000905387
ITPKC	-0.275526	0.000110837
CEACAM6	0.328779	0.514688
FAT2	0.620463	0.000206231
RBM22	-0.169686	0.000287626
TMED2	-0.0491548	0.387238
ERO1B	0.0423931	0.794119
ZFAND6	-0.101006	0.0294062
HSD17B2	-0.974752	5.70347e-11
TXLNG	0.516798	2.61443e-16
PPEF1	0.35656	0.0961383
LAT2	-0.192605	0.143078
HUWE1	0.312385	2.75269e-12
ZW10	0.197744	1.60321e-05
ALG9	0.232065	0.00943259
MYBPC2	0.333718	0.196827
NOX4	-0.18312	0.197551
ACOX3	-0.231971	0.00263812
MTMR2	0.462034	1.35178e-08
PPP1R15A	-0.159732	0.11604
HSD17B14	-0.688347	0.000492828
TRIP6	-0.306061	0.00492824
ACHE	0.0294064	0.922018
FTL	-0.721336	3.03758e-09
SRRT	0.10043	0.0429967
BAX	-0.265275	0.00178047
NLK	-0.0623214	0.282077
PIGS	0.334	2.41125e-05
ADAMTS2	-0.0597957	0.793269
TMPRSS11E	-0.266754	0.54406
ATXN7L3	0.38116	1.37401e-11
PGS1	0.260834	4.99695e-07
PSMC5	-0.618504	6.0907e-17
UIMC1	0.175478	0.000125665
CETP	-0.898001	4.39931e-09
MMP2	-0.255913	0.19559
MT3	-1.54393	4.17196e-05
LPCAT2	0.480081	0.00210743
GNAO1	-1.02709	2.88863e-06
OGFOD1	-0.135771	0.0119793
SH3BP2	0.0109497	0.930346
NOP14	0.0568896	0.359727
ADD1	0.160887	0.00199576
L2HGDH	0.16547	0.0840447
TXNDC16	0.364345	2.33621e-05
RTRAF	-0.42826	2.53176e-16
NID2	0.486961	0.00291505
GMCL1	0.392369	5.29653e-09
SF3B2	0.0333504	0.46514
KLHL42	0.41158	1.13794e-08
GNAS	0.0357539	0.74015
DNM1L	0.266511	2.56515e-07
PTHLH	1.11463	1.22506e-05
PHACTR3	-0.357293	0.135521
ERGIC2	0.142822	0.0251667
TFAP2C	-0.596321	0.115181
AURKA	0.392024	0.00122923
CASS4	0.217174	0.110777
PIR	-0.381468	0.0020422
AAMDC	-0.615	1.90795e-13
RFX2	0.27368	0.0089622
METTL2A	-0.206832	0.000671497
SULT2B1	-0.704021	0.0150598
ALG6	0.0326604	0.629041
CNOT3	0.300141	3.71924e-09
GP6	-0.563507	0.00701885
PTPN4	0.170327	0.0050578
DDX18	0.208271	3.31514e-05
KHSRP	0.289146	2.7184e-09
GNA11	-0.119326	0.0162368
ASAP3	-0.0103588	0.946624
EDEM2	-0.255402	1.01623e-06
DNMT3B	0.726477	2.64744e-10
REM1	-0.826159	6.97739e-09
TPX2	0.927949	2.3838e-14
FER1L4	0.783634	0.000607532
PDRG1	-0.256703	0.00028009
EPB41L1	-0.0201739	0.94235
SLC15A1	0.267938	0.210582
DOCK9	0.241007	0.0116199
ANKRD10	0.132639	0.0867305
TGDS	-0.132437	0.274526
DOCK3	1.04572	4.831e-10
C3orf18	0.0828281	0.506417
COQ9	-0.459876	1.09307e-08
TMEM40	-0.494701	0.0809073
KIF9	-0.38984	4.03705e-06
ARHGAP28	0.756747	2.41491e-05
CRLS1	-0.17033	0.137241
PPP1R13B	0.17071	0.0116193
ATRN	0.183033	0.0668615
SMOX	0.214417	0.184092
SIGLEC1	-0.0679796	0.698114
FKBP1A	-0.387961	1.40773e-08
NSFL1C	-0.199605	0.000466795
SLC4A11	0.956989	2.40003e-05
C20orf194	0.369954	0.000101269
ZNF343	0.177801	0.00274326
EBF4	-0.144448	0.505846
CPXM1	-0.560454	0.0027878
MAVS	0.174801	0.0111472
LZTS3	0.287874	0.00345858
F11	-0.294823	0.0633767
XRN2	0.278261	1.41349e-07
KIZ	0.212747	0.0316372
DYNLL1	-0.2618	2.37934e-05
TESC	-1.02613	1.60331e-05
SNX5	0.0578469	0.33473
RPL6	-0.327546	1.60461e-05
SIRPG	0.148762	0.522249
MAPKAPK5	0.157166	6.70454e-05
P2RX7	1.09863	9.44219e-15
ESF1	0.450671	2.21171e-12
RBBP9	0.0494026	0.635302
ANAPC5	0.106659	0.0167485
SLC23A2	-0.233386	0.0981674
SLC8B1	-0.115799	0.217788
TMEM230	-0.159022	0.00553533
DZANK1	0.387943	3.13806e-05
KDM2B	0.344657	1.62287e-08
CFAP61	0.690951	0.00391391
LHX5	0.578112	0.197229
TASP1	0.292966	1.38666e-05
OAS1	-0.269707	0.0419804
GCN1	0.263166	9.22158e-08
RPLP0	-0.239869	0.00957518
PXN	0.062065	0.278217
SIRT4	-0.217205	0.0107313
RPH3A	-0.248877	0.232763
KIF16B	0.253106	0.00114907
TRMT6	0.269341	2.97816e-06
CHGB	1.71248	3.55598e-07
PEBP1	-0.645796	1.68941e-13
TBX5	1.05706	0.0189143
BRAP	-0.00277922	0.958736
ERP29	-0.381139	4.86928e-10
NOS1	-0.530052	0.0711355
FUS	0.165614	0.0080546
IGBP1	-0.191296	0.00585998
FXYD5	-0.291601	0.0309096
ZNF302	0.170491	0.0153312
GRAMD1A	0.14639	0.265757
FXYD3	0.904842	0.00321446
HEPH	-0.0930043	0.601413
CDIP1	-0.249476	0.000909824
CMTM1	0.728566	3.37971e-08
KCNH4	0.117798	0.595668
GANAB	0.131518	0.00617124
GMIP	0.277959	0.00311284
RBM41	0.34566	2.05392e-07
BIRC5	0.408265	0.0121215
LAG3	-0.157506	0.475891
MLF2	-0.464331	1.72873e-19
OTUB2	0.161978	0.167209
DDX24	-0.0804873	0.1766
ZBTB25	-0.0590474	0.434025
NECAP1	-0.0267818	0.684706
ARHGAP4	-0.179064	0.239364
ANKRD24	-0.691201	1.22384e-09
DHX32	0.240976	0.0273942
RCOR1	0.301777	2.04962e-07
GPATCH2L	0.460471	4.32291e-16
LTBP4	-0.219311	0.189699
BLVRB	-0.828356	2.20568e-19
SLC9A1	0.0791018	0.52719
SPTLC1	0.274935	2.22328e-06
PAPOLA	0.148439	0.0011936
CCNK	0.813759	1.74117e-12
PCBP4	0.0396788	0.72094
RGS1	0.468836	0.0157569
YPEL3	-0.557656	1.11979e-14
MRPS33	-0.512617	9.90924e-16
NDUFB2	-0.883703	6.51236e-29
NUDC	-0.457629	3.7603e-09
MAEA	0.121667	0.0260308
ICAM1	0.40411	0.00611514
STRN4	0.211268	3.41755e-05
IRAK3	-0.0543307	0.766232
LYZ	1.05447	4.96978e-06
SI	1.00318	0.0763805
MUL1	-0.202927	0.000367231
TFAP4	0.0928849	0.225339
PDCD7	0.148697	0.000789328
SPG21	-0.149876	0.00272664
FETUB	-0.641189	0.00517639
DNAJB11	-0.0315659	0.671556
P3H2	0.04377	0.832099
THPO	-0.337666	0.00240304
CHRD	-0.293051	0.0341034
FLT3LG	0.0646497	0.711998
RAB11FIP3	0.020185	0.830136
GNPTG	-0.600603	7.45063e-21
ZNF268	0.102741	0.231907
GOLGA3	0.11589	0.0291416
PABPC4	0.00488534	0.957007
CD209	0.142581	0.427852
CERS4	-0.39139	0.00033945
MCOLN1	-0.0587718	0.450336
USP48	0.186723	9.48412e-05
EFNB1	-0.0258546	0.832454
PDPR	-0.000538163	0.99597
AARS1	-0.146701	0.0434608
GLG1	-0.0104025	0.892957
KIF4A	1.0567	6.8938e-15
TNRC6A	0.0927454	0.225637
PLEKHG2	0.314247	0.00142669
DLL3	0.747918	0.0319671
NAT14	-0.37909	0.00911178
PITPNM2	-0.198185	0.0715608
EXOC1	0.246401	5.79253e-06
RBM27	0.0200201	0.703537
POU4F3	-0.168366	0.34082
OSBPL8	0.505752	2.21171e-12
DTX2	-0.196281	0.00560432
NLRC4	0.0824423	0.416439
PUS7	0.44193	2.05244e-10
LAMB4	0.117556	0.534011
NRCAM	0.0893093	0.810089
LAMB1	0.460071	0.00042917
SLC26A4	0.0754486	0.632046
SLC26A3	0.369558	0.241954
DLD	-0.0873019	0.29468
WDR7	0.00988452	0.91095
TXNL1	-0.264488	2.59365e-06
IL5RA	0.0436657	0.874233
ABCC6	-0.415256	0.000125288
CMTM6	-0.0828156	0.358262
ITGA6	0.527383	4.34577e-08
RAPGEF4	0.100457	0.460242
MAP3K20	0.176736	0.0648326
SMPX	-0.517133	0.0807411
FH	-0.549053	2.95846e-10
SEL1L3	0.726701	0.000107071
TF	-0.562155	0.000178477
CDV3	0.146957	0.00164755
MYO15A	-0.108813	0.547405
ALKBH5	-0.0875613	0.230468
APOH	-0.842122	4.39698e-09
NLRP1	0.247296	0.0960013
PITPNM3	0.237664	0.290501
SPAG7	-0.631021	1.60877e-17
ORC6	0.843292	7.99661e-11
ZFHX4	0.355893	0.00598285
CPA1	0.291156	0.53107
ZC3HC1	-0.191979	0.000902925
ESR1	-0.741126	0.000886926
RGS17	0.735897	3.71522e-07
ANGPT2	0.315481	0.0154008
TMEM101	-0.280161	0.000371307
CD200	-0.0800774	0.599596
CCDC80	-0.26387	0.300199
CMA1	-0.868151	0.002403
PSME1	-0.476372	5.39922e-13
PPP2R3C	-0.0885741	0.145103
HAUS4	0.0927547	0.460474
JPH4	-0.131305	0.462302
MYH7	0.244223	0.564932
CEBPE	0.118687	0.636456
SLC7A8	0.592854	0.000112737
OSGEP	-0.225378	1.06797e-05
SLC22A17	-0.335789	0.18324
RNF31	0.277503	0.00971817
SCFD1	0.00382363	0.949508
G2E3	0.634524	7.31314e-28
HECTD1	0.24843	0.000440176
HNRNPC	0.0280365	0.504427
RPGRIP1	0.230726	0.0736335
SUPT16H	0.31775	1.69626e-12
TOX4	0.108791	0.00623126
GEMIN2	0.185261	0.00413329
TGM1	0.0568138	0.722609
TINF2	0.0287819	0.612805
DAZL	-0.30624	0.495584
TBL1Y	0.847333	0.0445709
SEMA6A	0.853345	5.67314e-06
TRPM7	0.419972	4.94916e-06
TYRO3	0.36865	0.0691976
WDR76	0.919938	2.62254e-15
CAPN3	0.290347	0.106416
SNAP23	0.183735	0.00191312
TBX15	-0.0282068	0.92215
PHGDH	0.0465357	0.84021
COL9A3	0.598319	0.00818996
EZR	-0.132496	0.27569
MYL6	-0.655915	5.62655e-21
AGO1	0.207432	0.00132257
TEKT2	0.30828	0.179732
CLSPN	1.19917	3.1854e-20
RFFL	0.352863	0.00028211
UNC13D	0.155206	0.368792
MFSD11	0.0485797	0.547356
DPYSL2	-0.0476056	0.725529
TGFB2	0.780519	1.62085e-05
GPATCH2	0.307173	2.67085e-07
NUP50	0.0680949	0.324978
CDC45	0.629668	1.58985e-06
COMT	-0.480613	8.24468e-06
ADA2	0.0156358	0.931332
AC016026.1	0.411381	0.0280348
VNN3	-0.523227	0.00856345
ECHDC1	-0.245701	0.00698957
LRRFIP2	0.0133166	0.8579
SEC22C	0.223651	1.59117e-07
XYLB	-0.0526218	0.692144
HDAC6	-0.137606	0.163552
OR1I1	-0.20487	0.528223
GABRP	-0.0747808	0.834807
KRT31	0.100069	0.905834
CDC6	0.954615	9.40317e-14
UPRT	0.0698208	0.309413
CDC23	0.339369	7.65525e-10
AAAS	-0.0111045	0.851231
CBX5	0.385718	1.29769e-06
FMO2	-0.17519	0.426295
SUCO	0.393359	1.06191e-07
MSH2	0.652158	7.57142e-25
[truncated: 34,718 more rows]
